# Supplementary material
Source: publisher figshare collection journal article supplement (https://geolsoc.figshare.com/ndownloader/files/14317145)
Supplement: Supplementary file 1 [file 14317145]

## Sheet: Sheet1
Table S5 Upukerora ch. 8 Felsic igneous rock clasts/bodies XRF
Sample no	2. OU-52-034	N14-27	N14-25	N14-29	N14-39	N14-42		N14-31	N14-43	N14-47
GPS	no record	E 21 54561 N54 93273	E 21 54520 N54 93379	E 21 54538 N54 93218	E 21 56025 N54 90571	E 21 56174 N54 90705		E 21 55354 N5 493632	E 21 58689 N54 86214	E 21 59207 N54 87062
area	Alpine area; col. D. Pillai)	N Lintley Hills	N Lintley Hills	N Lintley Hills	central Lintley Hills	central Lintley Hills		N Lintley Hills	S Lintley Hills	S Lintley Hills
lithology	felsic lava clast	felsic lava clast	plagiogranite block	diorite block	felsic lava clast	andesitic lava clast		andesitic lava flow	felsic lava body	felsic lava body
stratigraphy	Upukerora Fm.	Upukerora Fm.	Upukerora Fm.	Upukerora Fm.	Upukerora Fm.	Upukerora Fm.		Otama Complex	Otama Complex	Otama Complex
Major elements
SiO2	70.6113	72.55	72.2434	65.0335	78.6016	61.35		68.54	71.46	74.63
Al2O3	13.2961	14.43	12.4286	14.07	10.1804	13.87		12.9	13.51	12.04
Fe2O3	4.4019	2.88	1.512	7.2561	3.09575	9.96		5.31	3.38	3.18
MgO	1.37685	0.58	0.37296	2.66325	0.82215	3.12		1.43	0.73	1.04
CaO	1.33665	1.17	5.83632	2.0502	0.4466	2.51		3.07	0.68	0.68
Na2O	6.28125	5.25	0.34272	4.81395	5.14605	5.32		4.93	6.2	5.84
K2O	0.30954	0.602	0.598752	0.527625	0.04263	0.358		0.253	1.683	0.39
TiO2	0.766815	0.568	0.157248	0.61707	0.325815	0.687		0.686	0.595	0.394
MnO	0.071355	0.06	0.032256	0.10854	0.051765	0.125		0.091	0.1	0.087
P2O5	0.240195	0.104	0.037296	0.129645	0.068005	0.108		0.172	0.108	0.087
LOI	1.15	1.02	6.33	2.49	1.07	2.26		2.28	0.96	1.211
Total	99.842	99.21	99.8916	99.7599	99.8508	99.668		99.66	99.406	99.579
Trace elements
Zn	53.8	50.2	31.1	68.5	94.2	94.6		56	41.7	38.4
Cu	4.5	26.6	6	137.7	252.6	12		3.3	11.9	8.6
Ni	1.4	0.4	1.1	0.6	23.8	2.1		-1.2	1.2	2.2
Cr	4.2	2.2	1	1.6	29.1	1.1		-1	-0.7	2.5
V	47.3	29.2	16.8	116	368.2	176.5		6	35	25.6
Ba	27.7	119	135.4	46.6	113.6	58.8		10.3	201.4	94.5
Sc	19.7	12.2	4.4	28.9	36.4	43.2		10.1	11.2	12
La	4.4	6.3	20.8	3.1	1.7	1.4		4	11.3	1.7
Ce	14.1	20.8	43.8	14.8	9.7	9.9		19.1	36.2	15
Nd	12.9	15.4	18.8	10.1	6.8	8.9		16.2	24	12.7
U	0.8	0.2	3.5	0.1	-0.1	0		0	0.5	0.3
Th	0.7	0.6	18	0	0.9	1		0.4	1.8	0.5
Pb	0.7	3	23.7	2.3	4.3	3		2.1	3.5	0.6
Nb	1.6	4.4	7.3	1.2	0.8	0.6		1.9	5.2	1.4
Zr	87.1	175.9	123.4	91.4	55.6	48.6		168.7	225.9	108.1
Y	27.9	37.3	25.1	25.7	19.2	21.3		48.1	47.2	32.2
Sr	23.2	39.7	244.3	153.7	39.2	221.7		55	80.6	69.9
Rb	5	19.6	16	8.2	11.8	3		0.3	20.4	3.8
